# Supplementary material
Source: PubMed Central journal article supplement (PMC4820830)
Supplement: NIHMS772670-supplement-Fig_Legends.pdf [file NIHMS772670-supplement-Fig_Legends.pdf]

## LEGENDS TO FIGURES

**Figure 1. Morphology of a testis of 6-month-old WT (A,C,E) and bGH mice (B,D,F).** Red arrows – tubules with only Sertoli cells, yellow arrow - vacuole, black arrows - Leydig cells, asterix – lipofuscin-storing cell. PAS staining. Magnifications: 20× (A,B), 40× (C,D), 60× (E,F). Only representative microphotographs are presented.

**Figure 2. Morphology of testes of 12-month-old WT (A,C,E) and bGH mice (B,D,F).** Yellow arrow - vacuole, black arrows - Leydig cells, asterix – lipofuscin-storing cell. Inserts: tubules with missing generations of germ cells (B) and prematurely sloughed germ cells (D). PAS staining. Magnifications: 20× (A,B), 40× (C,D), 60× (E,F). Only representative microphotographs are presented.

**Figure 3. Immunoeexpression of androgen receptors in testes of 6-month-old WT (A) and bGH (B) and 12-month-old WT (C) and bGH (D) mice.** Brown arrows – Sertoli cells, magenta arrows – Leydig cells, blue arrows – peritubular cells. Magnification: 40×. Upper insert on panel A – negative control (20×).

**Figure 4. Immunoeexpression of LH receptors in testes of 6-month-old WT (A) and bGH (B) and 12-month-old WT (C) and bGH (D) mice.** Magenta arrows – Leydig cells. Magnification: 40×. Insert on panel A – negative control (40×).
